# Supplementary material for: Disaster risk reduction education in Indonesia: challenges and recommendations for scaling up
Source: Copernicus journal article supplement (doi:10.5194/nhess-17-595-2017), 2017-04-24
Supplement: Supplementary file 1 [file nhess-17-595-2017-supplement.pdf]

Supplement of Nat. Hazards Earth Syst. Sci., 17, 595–612, 2017  
<http://www.nat-hazards-earth-syst-sci.net/17/595/2017/>  
doi:10.5194/nhess-17-595-2017-supplement  
© Author(s) 2017. CC Attribution 3.0 License.

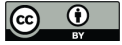

*Supplement of*

## **Disaster risk reduction education in Indonesia: challenges and recommendations for scaling up**

**Avianto Amri et al.**

*Correspondence to:* Avianto Amri (avianto.amri@gmail.com)

The copyright of individual parts of the supplement might differ from the CC-BY 3.0 licence.



2. I think it would be useful for children to learn about (please tick all that apply):

- Disaster prevention and preparedness
- Problem-solving/decision-making tools related to life problems
- How to be involved in the community to help prepare and to response when disasters strikes
- Climate change
- The environment and sustainability
- None of the above
- Other

If other, please describe here: \_\_\_\_\_

\_\_\_\_\_

3. I think the following institutions should be involved for children's education on disaster risk reduction (please tick all that apply):

- Their local school
- District disaster management agency
- District health office
- Local council
- Other

If other, please describe here: \_\_\_\_\_

\_\_\_\_\_

4. My school has included the following subject(s) in the curriculum: (please tick all that apply):

- Disaster prevention and preparedness
- Problem-solving/decision-making tools related to life problems
- How to be involved in the community to help prepare and to response when disasters strikes
- Climate change
- Environment and sustainability
- Other

If other, please describe here: \_\_\_\_\_

\_\_\_\_\_

5. My school has conducted the following activities (please tick all that apply):

- Table-top exercises
- Emergency response exercises and training
- Full disaster simulations

6. If you ticked any of the activities in question 5, do you think they were useful to improve preparedness?  Yes  No

7. If you **DID NOT** tick any of the activities in question 5, do you think any of them would be useful to improve preparedness?  Yes  No

8. How would you rate your school's coordination with the disaster management agency and local council, in relation to emergency management planning and preparedness?

- No  Very low  Low  Medium  High  Very High  I don't know
- coordination

9. Do you expect to have changes to your school's level of contact with other agencies in relation to emergency planning and preparedness?

- Yes  No

If yes, please describe the changes that you expect to occur:

---

---

10. What would be the barriers or challenges that might deter you from doing disaster risk reduction education for children in your classroom? (please tick all that apply)

- Lack of "ready to go" and "child-friendly" teaching resources**
- Lack of knowledge about disaster risk reduction**
- Lack of training in developing and/ or delivering programs of this sort**
- The topic is not relevant for the students**
- The topic is not a priority by the school management**
- Not compatible with my beliefs about what children should learn in school
- Not enough space in the curriculum
- Lack of interest from the community
- Not enough budget, and personnel
- Weak coordination between schools, disaster management agency, and local councils
- No clear mandate and/ or policies to implement disaster risk reduction education for children**
- Other

If other, please describe here: \_\_\_\_\_

11. What factors might help you to do disaster risk reduction education for children in your classroom? (please tick all that apply)

- Availability of useful "ready to go" and "child friendly" teaching resources
- Promotion on the teaching resources by other teachers or education personnel
- Training available on how to develop and/or deliver such programs for children
- Innovative methods for curriculum inclusion (e.g., combining learning with school drills)
- The topic becomes a priority by the school management**
- Topic is timely in relation to upcoming risk for local natural hazards (e.g., bushfire/fire/cyclone/flooding seasons)
- Personal interest in the topic
- Student interest in the topic
- Clear policies for school to deliver disaster risk reduction education for children
- Dedicated time, personnel, and budget made available
- Good partnerships between schools, disaster management agency, and local councils
- High demand from the local community/ students on disaster risk reduction education for children
- Other

If other, please describe here: \_\_\_\_\_

12. Would you be interested in training if it was offered and didn't impinge unduly on your time?

Yes

No

13. If yes, what type of training would you be interested in? (Please tick all that apply)

- Classroom or Instructor-Led training
- Experiential or Hands-on training
- Computer-Based training
- Online or E-learning
- Blended or combination of the above
- Others

If you select "blended or combination of the above" or "other", please explain briefly here:

---



---

14. Please indicate how prepared your school currently is to respond to a hazard

1 - Not at all

2

3

4 -

Moderately

5

6

7 - Very well

15. Below are the steps of contingency planning process. Please tick one option only under each of the 7 steps.

Step 1: Conducting risk assessment and analysis

- I think children should be involved in this process
- I think children should only be informed on the results of this process
- I don't think children should be involved nor informed in this process
- I am not sure
- I have other views: (please describe)

Step 2: Developing disaster scenarios

- I think children should be involved in this process
- I think children should only be informed on the results of this process
- I don't think children should be involved nor informed in this process
- I am not sure
- I have other views: (please describe)

Step 3: Analysis on the severity of disaster impacts

- I think children should be involved in this process
- I think children should only be informed on the results of this process
- I don't think children should be involved nor informed in this process
- I am not sure
- I have other views: (please describe)

Step 4: Identify policies and strategies during emergencies

- I think children should be involved in this process
- I think children should only be informed on the results of this process
- I don't think children should be involved nor informed in this process
- I am not sure
- I have other views: (please describe)

Step 5: Assessing projections of needs and the available resources (when disaster occurs)

- I think children should be involved in this process
- I think children should only be informed on the results of this process
- I don't think children should be involved nor informed in this process
- I am not sure
- I have other views: (please describe)

Step 6: Identifying a plan of action for building preparedness

- I think children should be involved in this process
- I think children should only be informed on the results of this process
- I don't think children should be involved nor informed in this process
- I am not sure
- I have other views: (please describe)

Step 7: Testing the contingency plan through disaster simulation

- I think children should be involved in this process
- I think children should only be informed on the results of this process
- I don't think children should be involved nor informed in this process
- I am not sure
- I have other views: (please describe)





4. If yes, where have you learned it from? **(please tick all that apply)**

- |                                                        |                                               |                                          |
|--------------------------------------------------------|-----------------------------------------------|------------------------------------------|
| <input type="checkbox"/> Father                        | <input type="checkbox"/> Mother               | <input type="checkbox"/> Grandparents    |
| <input type="checkbox"/> Brothers or sisters           | <input type="checkbox"/> Friends              | <input type="checkbox"/> Other relatives |
| <input type="checkbox"/> Extra curricula (e.g. scouts) | <input type="checkbox"/> Teachers             | <input type="checkbox"/> School books    |
| <input type="checkbox"/> Newspaper, magazines, or      | <input type="checkbox"/> TV, radio, or others | <input type="checkbox"/> Internet        |

others

Others. If you choose this, please describe below:

5. With whom do you share and discuss your daily activities? **(please tick all that apply)**

- |                                                   |                                            |                                          |
|---------------------------------------------------|--------------------------------------------|------------------------------------------|
| <input type="checkbox"/> Father                   | <input type="checkbox"/> Mother            | <input type="checkbox"/> Grandparents    |
| <input type="checkbox"/> Brothers or sisters      | <input type="checkbox"/> Friends at school | <input type="checkbox"/> Other relatives |
| <input type="checkbox"/> Friends at neighbourhood |                                            |                                          |

Others. If you choose this, please describe below:

6. Would you like to know more about how to stay safe from disasters?

- |                              |                             |                                        |
|------------------------------|-----------------------------|----------------------------------------|
| <input type="checkbox"/> Yes | <input type="checkbox"/> No | <input type="checkbox"/> I am not sure |
|------------------------------|-----------------------------|----------------------------------------|

Why? Please briefly explain your answer

7. Do you feel worried, scared, or upset when you think or talk about disasters, such as floods or fire?

- |                          |                          |                          |                          |                          |
|--------------------------|--------------------------|--------------------------|--------------------------|--------------------------|
| <input type="checkbox"/> |
| Not at all               | Yes, sometimes           | Yes, often               | Yes, always              | I am not sure            |

8. I can make myself comfortable or calm in an emergency

- |                          |                          |                          |                          |
|--------------------------|--------------------------|--------------------------|--------------------------|
| <input type="checkbox"/> | <input type="checkbox"/> | <input type="checkbox"/> | <input type="checkbox"/> |
| Yes, I can               | Maybe                    | No, I can not            | I am not sure            |

9. I can help other children to feel comfortable or less upset in an emergency

Yes, I can

Maybe

No, I can not

I am not sure

10. Have you ever done drills at home?

Yes

No

I am not sure

11. Have you ever done drills at your school?

Yes

No

I am not sure

12. Does your house have preparedness plans (a document explaining what to do before and during disasters)?

Yes

No

I am not sure

13. If not, do you want to have it in your house?

Yes

No

I am not sure

14. Do you think you should be involved in developing the plan?

Yes

No

I am not sure

15. Do you want your school to have disaster preparedness plans?

Yes

No

I am not sure

16. Do you think you should be involved in developing the plan?

Yes

No

I am not sure

17. What do you think on **your school** readiness to face disaster risks?

Very not prepared

Not prepared

Prepared

Very prepared

I am not sure

18. What do you think on **your home** readiness to face disaster risks?

Very not prepared

Not prepared

Prepared

Very prepared

I am not sure

19. Would you like to be involved in making your school to be more prepared for disasters?

Yes

No

I am not sure

20. Would you like to be involved in making your home to be more prepared for disasters?

Yes

No

I am not sure

Why? Please briefly explain your answer

### Questions related to knowledge and skills on fire preparedness

21. List five (5) things that you need to do to prevent fire in our home?

22. If we hear danger signs (wailing siren, bamboo knocking, electric pole knocking, alarm bells, etc) what should you do?

- a. Ignore it and keep playing
- b. Run toward the sounds
- c. Stop, listen and do what you told
- d. I don't know

23. If you are sitting in a class at school when a fire breaks out, which one of these is the correct procedure
- Everyone shout "Fire!" and run out
  - Follow teachers' instructions. Don't talk. Don't run. Don't push. Don't go back
  - Pick up all my belongings and look for a telephone
  - I don't know
24. How do you put out fire from a burning stove?
- Throw cold water
  - Throw warm water
  - Cover it with a damp towel or blanket
  - I don't know
25. If you are at home and there is a fire approaching, what should you do?
- Stay inside
  - Go outside away from the fire
  - Go outside to get a better view
  - I don't know

### Questions related to flood and tidal wave preparedness

26. List five (5) things that we should do during floods or tidal wave in our home or surrounding environments:

27. What should you be aware of when flood water has receded?
- People, pets, and bugs
  - Nothing to worry about
  - Stay away from electric poles, fallen trees, and wild animals such as snakes
  - I don't know
28. If you are at home and flooding starts, what should you do?
- Go outside and play with water
  - Turn off electronics and put things up high
  - Watch TV or listen to the radio
  - I don't know
29. What should you do when you hear or see signs of flooding?
- Go to a higher and safer place
  - Go outside and play with water
  - Nothing
  - I don't know
30. If you must enter flood waters, what should you wear on your feet?
- Boots or waterproof shoes
  - Slippers
  - Bare feet
  - I don't know

31. If you must enter flood waters, what should you check?
- Temperature
  - Depth
  - Bugs
  - I don't know
32. What should you use to check the flood waters?
- Stick
  - Legs
  - Eyes
  - I don't know
33. If you must enter flood waters, what should you look out for?
- Boats
  - Bugs
  - Snakes or other wild animals
  - I don't know
34. Should you go into water that is more than knee-deep?
- Yes, because I can swim
  - No, because I cannot swim
  - No, because it is dangerous
  - I don't know
35. When you return to your house after flood waters recede, what do you do?
- Leave it
  - Clean it as much as we can. Use protective clothing and be very careful
  - Play inside
  - I don't know

#### **Questions related to hygiene practices**

36. Do you think it is safe to eat food that has been in contact with flood water?
- No, if it looks dirty
  - No, throw it out
  - Yes, if it looks okay
  - I don't know
37. How do we make sure that the water we drink is safe after flooding?
- Drink boiled water or bottled water only
  - Drink the water if it looks clean
  - We should not drink for a while
  - I don't know
38. To kill germs, we should wash our hands using:
- Water
  - Running water and soap
  - Water, soap, and tissue
  - I don't know
39. When do you wash your hands with soap?
- Before eating
  - Before and after eating
  - Before and after eating and also before and after peeing and defecate (poop)
  - I don't know

40. If your house is flooded and you want to poop, what should you do?
- a. Poop anywhere since it is an emergency
  - b. Poop at your neighbor house, shelter or other latrine that is not flooded
  - c. We should wait to poop until the flood water going down
  - d. I don't know

\*\* FINISHED \*\* 😊

Thank you very much for your thoughts and taking the time to complete this survey
